# Supplementary material for: Validity and reliability of the self-rated fall risk questionnaire in older adults with osteoporosis
Source: Springer Nature journal article supplement (doi:10.1186/s12891-020-03788-z), 2020-11-18
Supplement: MOESM1 [file 18599154]

### Supplementary table

#### Reliability of the self-rated fall risk questionnaire

| self-rated FRQ                                                                                       | retest-self-rated FRQ |                       | Test-retest reliability<br>(Kappa statistics) | p value |
|------------------------------------------------------------------------------------------------------|-----------------------|-----------------------|-----------------------------------------------|---------|
|                                                                                                      | yes                   | no                    |                                               |         |
| I have fallen in the past year.<br>- yes<br>- no                                                     | 8 (100.0)<br>0 (0.0)  | 0 (0.0)<br>22 (100.0) | 1.000                                         | < 0.001 |
| I use or have been advised to use a cane or walker to get around safely.<br>- yes<br>- no            | 15 (100.0)<br>0 (0.0) | 0 (0.0)<br>15 (100.0) | 1.000                                         | < 0.001 |
| Sometimes I feel unsteady when I am walking.<br>- yes<br>- no                                        | 17 (100.0)<br>0 (0.0) | 0 (0.0)<br>13 (100.0) | 1.000                                         | < 0.001 |
| I steady myself by holding onto furniture when walking at home.<br>- yes<br>- no                     | 12 (100.0)<br>0 (0.0) | 1 (5.6)<br>17 (94.4)  | 0.932                                         | < 0.001 |
| I am worried about falling.<br>- yes<br>- no                                                         | 16 (100.0)<br>0 (0.0) | 0 (0.0)<br>14 (100.0) | 1.000                                         | < 0.001 |
| I need to push with my hands to stand up from a chair.<br>- yes<br>- no                              | 16 (100.0)<br>0 (0.0) | 0 (0.0)<br>14 (100.0) | 1.000                                         | < 0.001 |
| I have some trouble stepping up onto a curb.<br>- yes<br>- no                                        | 16 (100.0)<br>0 (0.0) | 0 (0.0)<br>14 (100.0) | 1.000                                         | < 0.001 |
| I often have to rush to the toilet.<br>- yes<br>- no                                                 | 14 (100.0)<br>0 (0.0) | 3 (18.8)<br>13 (81.3) | 0.802                                         | < 0.001 |
| I have lost some feeling in my feet.<br>- yes<br>- no                                                | 7 (100.0)<br>0 (0.0)  | 1 (4.3)<br>22 (95.7)  | 0.911                                         | < 0.001 |
| I take medicine that sometimes makes me feel light-headed or more tired than usual.<br>- yes<br>- no | 2 (100.0)<br>0 (0.0)  | 1 (3.6)<br>27 (96.4)  | 0.783                                         | < 0.001 |
| I take medicine to help me sleep or improve my mood.<br>- yes                                        | 7 (100.0)             | 2 (8.7)               | 0.831                                         | < 0.001 |

| self-rated FRQ                 | retest-self-rated FRQ |            | Test-retest reliability<br>(Kappa statistics) | <i>p</i> value |
|--------------------------------|-----------------------|------------|-----------------------------------------------|----------------|
|                                | yes                   | no         |                                               |                |
| - no                           | 0 (0.0)               | 21 (91.3)  |                                               |                |
| I often feel sad or depressed. |                       |            |                                               |                |
| - yes                          | 5 (100.0)             | 0 (0.0)    | 1.000                                         | < 0.001        |
| - no                           | 0 (0.0)               | 25 (100.0) |                                               |                |
| Total score                    |                       |            |                                               |                |
| - yes                          | 19 (100.0)            | 0 (0.0)    | 1.000                                         | < 0.001        |
| - no                           | 0 (0.0)               | 11 (100.0) |                                               |                |

**Abbreviations:** *p* value = Kappa statistics

*p* value < 0.05 indicates statistical significance

*self-rated FRQ* self-rated Fall Risk Questionnaire
